# Supplementary material for: Functional connectivity between the amygdala and prefrontal cortex underlies processing of emotion ambiguity
Source: PubMed Central journal article supplement (PMC10613296; doi:10.1038/s41398-023-02625-w), 2023-10-28
Supplement: 41398_2023_2625_MOESM1_ESM.pdf [file 41398_2023_2625_MOESM1_ESM.pdf]

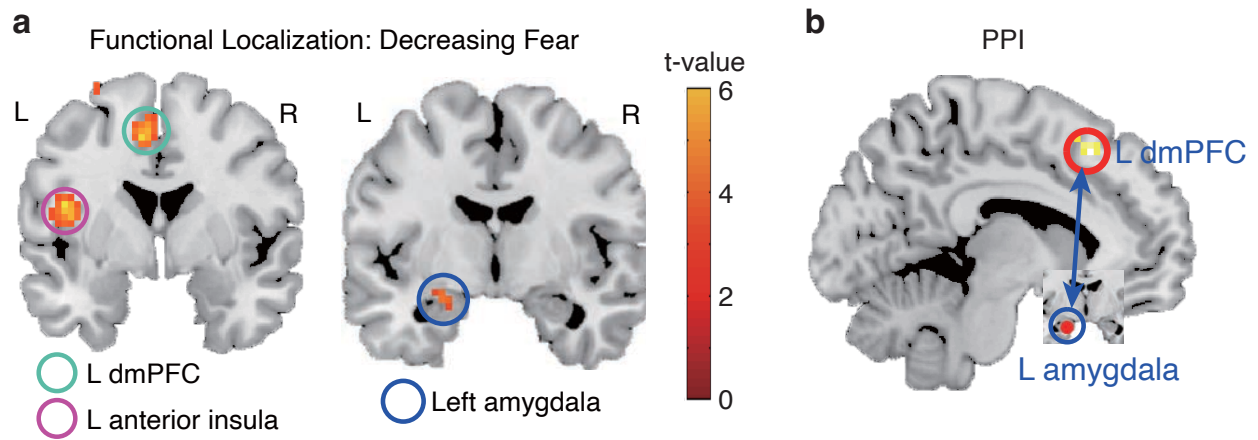

**Supplementary Fig. 1.** Psychophysiological interaction (PPI) analysis for emotion (i.e., fear) intensity. **(a)** Decreasing fear intensity was correlated with increasing BOLD activity in the left dorsomedial prefrontal cortex (dmPFC), left anterior insular, and left amygdala. **(b)** PPI analysis revealed functional connectivity between the amygdala and dmPFC (peak:  $x = -9, y = 24, z = 48$ ; 13 voxels, SVC, FWE  $P = 0.05$ ).

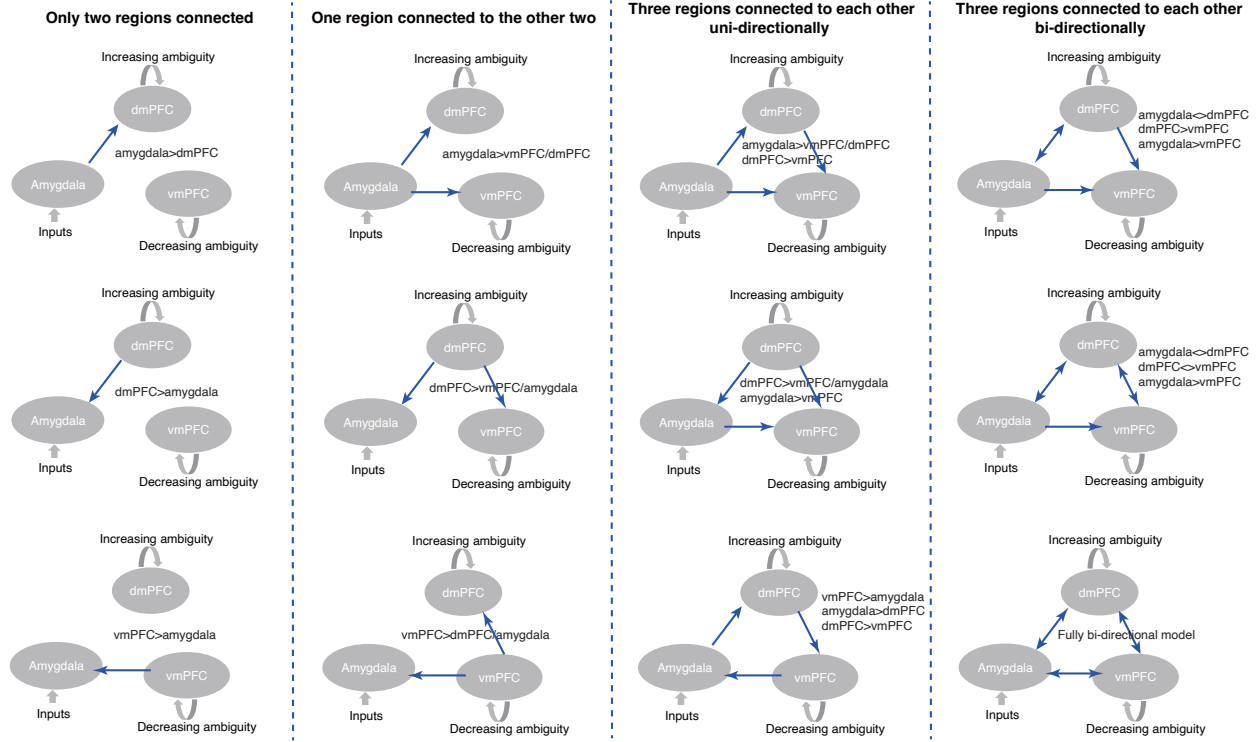

**Supplementary Fig. 2.** A list of dynamic causal modeling (DCM) models that were analyzed in the present study.

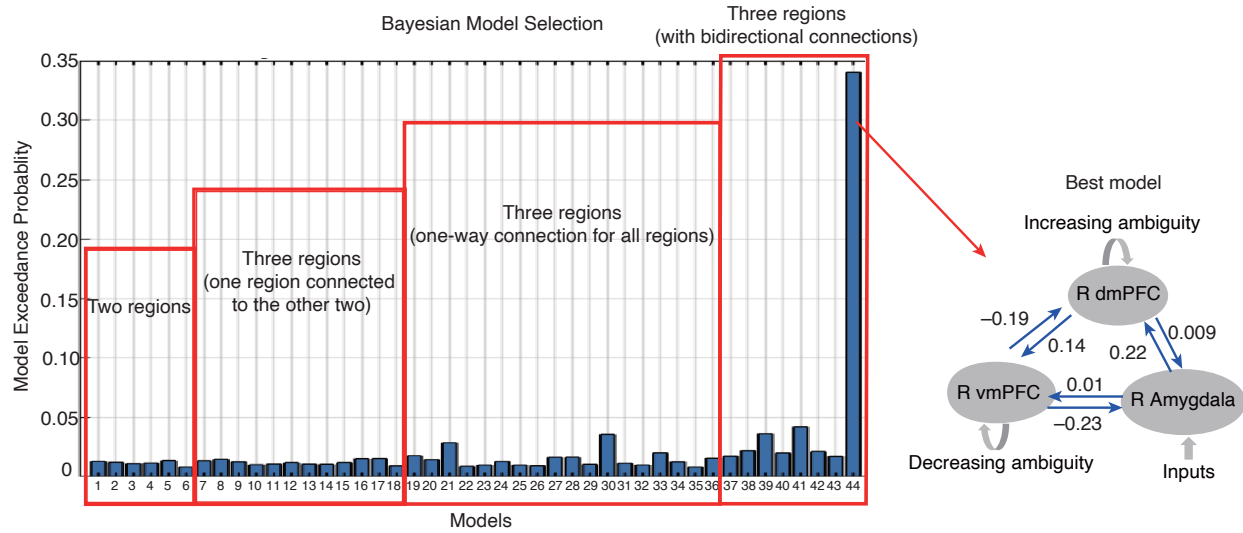

**Supplementary Fig. 3.** Control DCM analysis with the right dorsomedial prefrontal cortex (dmPFC) and ventromedial prefrontal cortex (vmPFC). Legend conventions as in Fig. 2.

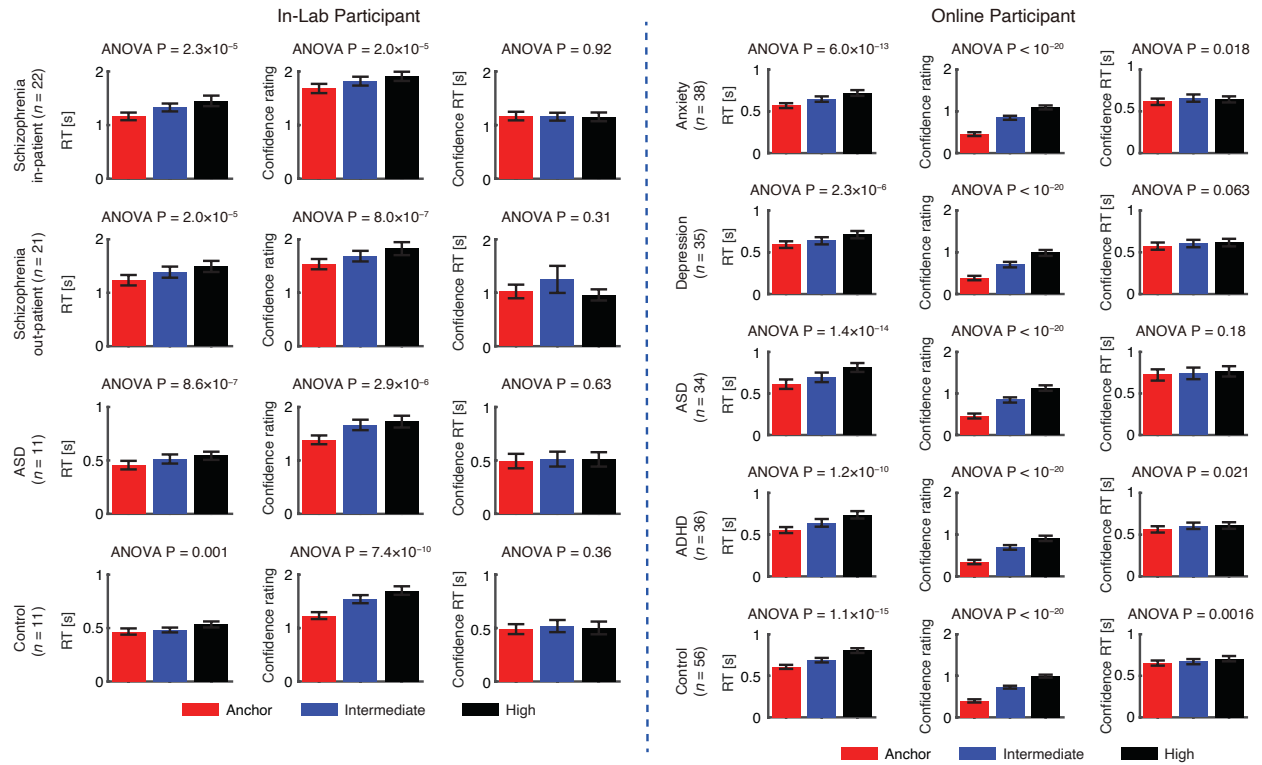

**Supplementary Fig. 4.** Reaction time (RT) and confidence rating (CR) for each condition and each participant group. Error bars denote  $\pm$ SEM across participants. Shown above each plot are the p-values from one-way repeated measures ANOVA across conditions.
